# Supplementary material
Source: PubMed Central journal article supplement (PMC4753282)
Supplement: supp_kwv212_kwv212supp.pdf [file supp_kwv212_kwv212supp.pdf]

**Web Table 1.** Effects of Different Practice Effects Specifications on Cognitive Change for Depression, by Study, Balanced Data From 3C-Dijon (Dijon, France, 1999–2010), NAS (Greater Boston Area, MA, 1993–2007) and WHICAP (New York City, NY, 1999–2012) Using Age (Years) as the Time Scale With Main Exposure by Time Interaction

|                                  | No Practice Effects |              |                |          | Visit 1 Indicator |              |                |          | No. of Prior Tests |              |                |          | Square Root of No. of Prior Tests |              |                |          |
|----------------------------------|---------------------|--------------|----------------|----------|-------------------|--------------|----------------|----------|--------------------|--------------|----------------|----------|-----------------------------------|--------------|----------------|----------|
|                                  | $\beta$             | 95% CI       | <i>P</i> Value | AIC      | $\beta$           | 95% CI       | <i>P</i> Value | AIC      | $\beta$            | 95% CI       | <i>P</i> Value | AIC      | $\beta$                           | 95% CI       | <i>P</i> Value | AIC      |
| <b>Verbal Fluency - 3C-Dijon</b> |                     |              |                |          |                   |              |                |          |                    |              |                |          |                                   |              |                |          |
| depression <sup>a</sup>          | -0.56               | -0.96, -0.17 | 0.01           | 52229    | -0.56             | -0.96, -0.17 | 0.01           | 52138    | -0.56              | -0.96, -0.17 | 0.01           | 52207    | -0.56                             | -0.96, -0.17 | 0.01           | 52148    |
| depression*time                  | 0.00                | -0.04, 0.05  | 0.84           |          | 0.01              | -0.04, 0.05  | 0.82           |          | 0.01               | -0.04, 0.05  | 0.79           |          | 0.01                              | -0.04, 0.05  | 0.80           |          |
| PE                               |                     |              |                |          | 0.72              | 0.58, 0.87   | <0.01          |          | 0.59               | 0.35, 0.82   | <0.01          |          | 0.80                              | 0.63, 0.97   | <0.01          |          |
| time <sup>b</sup>                | -0.14               | -0.15, -0.12 | <0.01          |          | -0.20             | -0.22, -0.18 | <0.01          |          | -0.40              | -0.5, -0.29  | <0.01          |          | -0.30                             | -0.34, -0.26 | <0.01          |          |
| <b>Verbal Fluency - WHICAP</b>   |                     |              |                |          |                   |              |                |          |                    |              |                |          |                                   |              |                |          |
| depression <sup>a</sup>          | -0.03               | -6.52, 6.45  | 0.99           | 12024.22 | -0.04             | -6.53, 6.45  | 0.99           | 12023.34 | -0.07              | -6.57, 6.43  | 0.98           | 12025.04 | -0.06                             | -6.55, 6.44  | 0.99           | 12023.19 |
| depression*time                  | -0.01               | -0.09, 0.08  | 0.89           |          | -0.01             | -0.09, 0.08  | 0.89           |          | -0.01              | -0.09, 0.08  | 0.90           |          | -0.01                             | -0.09, 0.08  | 0.89           |          |
| PE                               |                     |              |                |          | 0.37              | -0.06, 0.80  | 0.09           |          | 0.34               | -0.27, 0.96  | 0.27           |          | 0.47                              | -0.06, 0.99  | 0.08           |          |
| time                             | -0.23               | -0.28, -0.18 | <0.01          |          | -0.27             | -0.34, -0.20 | <0.01          |          | -0.36              | -0.60, -0.12 | <0.01          |          | -0.33                             | -0.45, -0.21 | <0.01          |          |
| <b>Verbal Fluency - NAS</b>      |                     |              |                |          |                   |              |                |          |                    |              |                |          |                                   |              |                |          |
| depression <sup>a</sup>          | 0.27                | -1.15, 1.70  | 0.71           | 5605.2   | 0.26              | -1.17, 1.69  | 0.72           | 5606.9   | 0.32               | -1.1, 1.74   | 0.66           | 5606.1   | 0.28                              | -1.15, 1.70  | 0.70           | 5607.2   |
| depression*time                  | 0.03                | -0.13, 0.19  | 0.75           |          | 0.02              | -0.14, 0.19  | 0.76           |          | 0.03               | -0.13, 0.19  | 0.68           |          | 0.03                              | -0.13, 0.19  | 0.74           |          |
| PE                               |                     |              |                |          | 0.20              | -0.55, 0.95  | 0.60           |          | -0.45              | -1.29, 0.40  | 0.30           |          | -0.04                             | -0.96, 0.87  | 0.93           |          |
| time <sup>b</sup>                | -0.14               | -0.20, -0.07 | <0.01          |          | -0.16             | -0.27, -0.05 | <0.01          |          | -0.03              | -0.25, 0.19  | 0.80           |          | -0.13                             | -0.30, 0.04  | 0.14           |          |
| <b>Buschke - WHICAP</b>          |                     |              |                |          |                   |              |                |          |                    |              |                |          |                                   |              |                |          |
| depression <sup>a</sup>          | -7.87               | -20.64, 4.90 | 0.23           | 14845.85 | -7.87             | -20.65, 4.90 | 0.23           | 14847.80 | -7.87              | -20.65, 4.90 | 0.23           | 14847.85 | -7.88                             | -20.65, 4.90 | 0.23           | 14847.84 |
| depression*time                  | 0.09                | -0.07, 0.25  | 0.28           |          | 0.09              | -0.07, 0.25  | 0.28           |          | 0.09               | -0.07, 0.25  | 0.28           |          | 0.09                              | -0.07, 0.25  | 0.28           |          |
| PE                               |                     |              |                |          | 0.10              | -0.73, 0.93  | 0.82           |          | 0.01               | -1.19, 1.20  | 0.99           |          | 0.05                              | -0.96, 1.07  | 0.92           |          |
| time <sup>b</sup>                | -0.53               | -0.63, -0.42 | <0.01          |          | -0.54             | -0.67, -0.40 | <0.01          |          | -0.53              | -0.99, -0.06 | 0.03           |          | -0.54                             | -0.77, -0.30 | <0.01          |          |
| <b>Immediate Recall - NAS</b>    |                     |              |                |          |                   |              |                |          |                    |              |                |          |                                   |              |                |          |
| depression <sup>a</sup>          | 0.08                | -1.21, 1.36  | 0.91           | 5140.4   | 0.06              | -1.22, 1.34  | 0.93           | 5140.5   | 0.06               | -1.23, 1.34  | 0.93           | 5142.0   | 0.05                              | -1.24, 1.33  | 0.94           | 5140.8   |
| depression*time                  | 0.02                | -0.09, 0.14  | 0.68           |          | 0.02              | -0.09, 0.14  | 0.71           |          | 0.02               | -0.09, 0.14  | 0.71           |          | 0.02                              | -0.1, 0.14   | 0.73           |          |
| PE                               |                     |              |                |          | 0.38              | -0.16, 0.93  | 0.17           |          | 0.21               | -0.44, 0.85  | 0.53           |          | 0.45                              | -0.23, 1.12  | 0.20           |          |
| time <sup>b</sup>                | -0.07               | -0.11, -0.02 | <0.01          |          | -0.12             | -0.2, -0.03  | 0.01           |          | -0.12              | -0.28, 0.05  | 0.16           |          | -0.15                             | -0.27, -0.02 | 0.02           |          |

3C, Three-City Study; AIC, Akaike information criterion; Buschke, Buschke Selective Reminding test; CI, confidence interval, NAS, Normative Aging Study; WHICAP, Washington Heights-Inwood Community Aging Project.

a. Depression coefficients are for depressive patients.

b. Time coefficients are for one year of aging.

**Web Table 2.** Effects of Different Practice Effects Specifications on Cognitive Change for Diabetes, by Study, Balanced Data From 3C-Dijon (Dijon, France, 1999–2010), NAS (Greater Boston Area, MA, 1993–2007) and WHICAP (New York City, NY, 1999–2012) Using Age (Years) as the Time Scale With Main Exposure by Time Interaction

|                                | No Practice Effects |               |                |          | Visit 1 Indicator |               |                |          | No. of Prior Tests |               |                |          | Square Root of No. of Prior Tests |               |                |          |
|--------------------------------|---------------------|---------------|----------------|----------|-------------------|---------------|----------------|----------|--------------------|---------------|----------------|----------|-----------------------------------|---------------|----------------|----------|
|                                | $\beta$             | 95% CI        | <i>P</i> Value | AIC      | $\beta$           | 95% CI        | <i>P</i> Value | AIC      | $\beta$            | 95% CI        | <i>P</i> Value | AIC      | $\beta$                           | 95% CI        | <i>P</i> Value | AIC      |
| <b>Verbal Fluency 3C-Dijon</b> |                     |               |                |          |                   |               |                |          |                    |               |                |          |                                   |               |                |          |
| diabetes <sup>a</sup>          | -0.60               | -1.09, -0.11  | 0.02           | 52231    | -0.60             | -1.09, -0.11  | 0.02           | 52140    | -0.60              | -1.09, -0.11  | 0.02           | 52209    | -0.60                             | -1.09, -0.11  | 0.02           | 52150    |
| diabetes*time                  | 0.00                | -0.06, 0.05   | 0.97           |          | 0.00              | -0.06, 0.05   | 0.97           |          | 0.00               | -0.06, 0.05   | 0.96           |          | 0.00                              | -0.06, 0.05   | 0.97           |          |
| PE                             |                     |               |                |          | 0.72              | 0.58, 0.87    | <0.01          |          | 0.59               | 0.35, 0.82    | <0.01          |          | 0.80                              | 0.63, 0.97    | <0.01          |          |
| time <sup>b</sup>              | -0.14               | -0.15, -0.12  | <0.01          |          | -0.20             | -0.22, -0.18  | <0.01          |          | -0.40              | -0.5, -0.29   | <0.01          |          | -0.30                             | -0.34, -0.26  | <0.01          |          |
| <b>Verbal Fluency WHICAP</b>   |                     |               |                |          |                   |               |                |          |                    |               |                |          |                                   |               |                |          |
| diabetes <sup>a</sup>          | -4.11               | -12.81, 4.60  | 0.35           | 12066.02 | -4.18             | -12.89, 4.53  | 0.35           | 12064.84 | -4.39              | -13.13, 4.34  | 0.32           | 12066.76 | -4.31                             | -13.03, 4.41  | 0.33           | 12064.71 |
| diabetes*time                  | 0.04                | -0.07, 0.15   | 0.47           |          | 0.04              | -0.07, 0.15   | 0.46           |          | 0.04               | -0.07, 0.16   | 0.43           |          | 0.04                              | -0.07, 0.16   | 0.44           |          |
| PE                             |                     |               |                |          | 0.39              | -0.04, 0.81   | 0.07           |          | 0.35               | -0.26, 0.97   | 0.26           |          | 0.49                              | -0.04, 1.01   | 0.07           |          |
| time <sup>b</sup>              | -0.24               | -0.28, -0.19  | <0.01          |          | -0.28             | -0.35, -0.21  | <0.01          |          | -0.37              | -0.61, -0.13  | <0.01          |          | -0.34                             | -0.46, -0.22  | <0.01          |          |
| <b>Verbal Fluency NAS</b>      |                     |               |                |          |                   |               |                |          |                    |               |                |          |                                   |               |                |          |
| diabetes <sup>a</sup>          | 0.20                | -1.74, 2.13   | 0.84           | 7872.4   | 0.20              | -1.74, 2.13   | 0.84           | 7874.4   | 0.24               | -1.7, 2.17    | 0.81           | 7873.6   | 0.21                              | -1.72, 2.14   | 0.83           | 7874.2   |
| diabetes*time                  | 0.18                | -0.02, 0.39   | 0.08           |          | 0.18              | -0.02, 0.39   | 0.08           |          | 0.19               | -0.02, 0.39   | 0.07           |          | 0.19                              | -0.02, 0.39   | 0.08           |          |
| PE                             |                     |               |                |          | -0.01             | -0.64, 0.62   | 0.97           |          | -0.33              | -1.02, 0.36   | 0.35           |          | -0.17                             | -0.91, 0.58   | 0.66           |          |
| time <sup>b</sup>              | -0.14               | -0.2, -0.09   | <0.01          |          | -0.14             | -0.23, -0.05  | <0.01          |          | -0.06              | -0.24, 0.11   | 0.50           |          | -0.11                             | -0.25, 0.03   | 0.11           |          |
| <b>Buschke WHICAP</b>          |                     |               |                |          |                   |               |                |          |                    |               |                |          |                                   |               |                |          |
| diabetes <sup>a</sup>          | -18.38              | -35.52, -1.24 | 0.04           | 14895.78 | -18.39            | -35.53, -1.25 | 0.04           | 14897.76 | -18.39             | -35.56, -1.21 | 0.04           | 14897.78 | -18.39                            | -35.54, -1.24 | 0.04           | 14897.78 |
| diabetes*time                  | 0.19                | -0.03, 0.41   | 0.08           |          | 0.19              | -0.03, 0.41   | 0.08           |          | 0.19               | -0.03, 0.41   | 0.08           |          | 0.19                              | -0.03, 0.41   | 0.08           |          |
| PE                             |                     |               |                |          | 0.07              | -0.76, 0.89   | 0.88           |          | 0.00               | -1.20, 1.20   | 1.00           |          | 0.02                              | -1.00, 1.04   | 0.97           |          |
| time <sup>b</sup>              | -0.53               | -0.62, -0.44  | <0.01          |          | -0.54             | -0.67, -0.41  | <0.01          |          | -0.53              | -1.00, -0.07  | 0.03           |          | -0.53                             | -0.77, -0.30  | <0.01          |          |
| <b>Immediate Recall NAS</b>    |                     |               |                |          |                   |               |                |          |                    |               |                |          |                                   |               |                |          |
| diabetes <sup>a</sup>          | 0.54                | -1.18, 2.25   | 0.54           | 7264.1   | 0.49              | -1.22, 2.20   | 0.57           | 7259.9   | 0.49               | -1.22, 2.20   | 0.58           | 7264.6   | 0.47                              | -1.24, 2.18   | 0.59           | 7260.8   |
| diabetes*time                  | 0.01                | -0.14, 0.15   | 0.93           |          | 0.00              | -0.14, 0.15   | 0.98           |          | 0.00               | -0.14, 0.15   | 0.98           |          | 0.00                              | -0.15, 0.14   | 0.995          |          |
| PE                             |                     |               |                |          | 0.57              | 0.12, 1.02    | 0.01           |          | 0.32               | -0.20, 0.84   | 0.22           |          | 0.64                              | 0.10, 1.19    | 0.02           |          |
| time <sup>b</sup>              | -0.08               | -0.12, -0.04  | <0.01          |          | -0.15             | -0.22, -0.08  | <0.01          |          | -0.16              | -0.29, -0.03  | 0.02           |          | -0.19                             | -0.29, -0.09  | <0.01          |          |

3C, Three-City Study; AIC, Akaike information criterion; Buschke, Buschke Selective Reminding test; CI, confidence interval, NAS, Normative Aging Study; WHICAP, Washington Heights-Inwood Community Aging Project.

a. Diabetes coefficients are for diabetic patients.

b. Time coefficients are for one year of aging.

**Web Table 3.** Effects of Different Practice Effects Specifications on Cognitive Change for Diabetes, by Study, Unbalanced Data From 3C-Dijon (Dijon, France, 1999–2010), NAS (Greater Boston Area, MA, 1993–2007) and WHICAP (New York City, NY, 1999–2012) Using Time Elapsed (Years) Since Baseline as the Time Scale With Main Exposure by Time Interaction

|                                         | No Practice Effects |              |         |          | Visit 1 Indicator |              |         |          | No. of Prior Tests |              |         |          | Square Root of No. of Prior Tests |              |         |          |
|-----------------------------------------|---------------------|--------------|---------|----------|-------------------|--------------|---------|----------|--------------------|--------------|---------|----------|-----------------------------------|--------------|---------|----------|
|                                         | $\beta$             | 95% CI       | P Value | AIC      | $\beta$           | 95% CI       | P Value | AIC      | $\beta$            | 95% CI       | P Value | AIC      | $\beta$                           | 95% CI       | P Value | AIC      |
| <b>Verbal Fluency 3C-Dijon</b>          |                     |              |         |          |                   |              |         |          |                    |              |         |          |                                   |              |         |          |
| diabetes <sup>a</sup>                   | -0.47               | -0.84, -0.11 | 0.01    | 90884    | -0.46             | -0.83, -0.10 | 0.01    | 90806    | -0.47              | -0.83, -0.10 | 0.01    | 90828    | -0.46                             | -0.83, -0.10 | 0.01    | 90801    |
| diabetes*time                           | -0.04               | -0.10, 0.01  | 0.10    |          | -0.05             | -0.10, 0.01  | 0.09    |          | -0.05              | -0.10, 0.00  | 0.07    |          | -0.05                             | -0.10, 0.01  | 0.08    |          |
| PE                                      |                     |              |         |          | 0.49              | 0.39, 0.60   | <0.01   |          | 0.60               | 0.44, 0.75   | <0.01   |          | 0.60                              | 0.47, 0.73   | <0.01   |          |
| time <sup>b</sup>                       | -0.14               | -0.15, -0.12 | <0.01   |          | -0.19             | -0.21, -0.17 | <0.01   |          | -0.40              | -0.47, -0.33 | <0.01   |          | -0.27                             | -0.30, -0.24 | <0.01   |          |
| <b>Verbal Fluency WHICAP</b>            |                     |              |         |          |                   |              |         |          |                    |              |         |          |                                   |              |         |          |
| diabetes <sup>a</sup>                   | -0.81               | -1.85, 0.25  | 0.13    | 12051.69 | -0.81             | -1.86, 0.24  | 0.13    | 12050.38 | -0.81              | -1.86, 0.24  | 0.13    | 12052.30 | -0.81                             | -1.86, 0.24  | 0.13    | 12050.22 |
| diabetes*time                           | -0.03               | -0.17, 0.11  | 0.65    |          | -0.03             | -0.17, 0.11  | 0.66    |          | -0.03              | -0.17, 0.11  | 0.70    |          | -0.03                             | -0.17, 0.11  | 0.69    |          |
| PE                                      |                     |              |         |          | 0.39              | -0.03, 0.80  | 0.07    |          | 0.38               | -0.25, 1.02  | 0.24    |          | 0.49                              | -0.03, 1.01  | 0.06    |          |
| time <sup>b</sup>                       | -0.23               | -0.28, -0.17 | <0.01   |          | -0.27             | -0.34, -0.20 | <0.01   |          | -0.37              | -0.62, -0.12 | <0.01   |          | -0.33                             | -0.45, -0.21 | <0.01   |          |
| <b>Verbal Fluency NAS<sup>c</sup></b>   |                     |              |         |          |                   |              |         |          |                    |              |         |          |                                   |              |         |          |
| diabetes <sup>a</sup>                   | -0.16               | -1.23, 0.90  | 0.76    | 14081.0  | -0.17             | -1.24, 0.89  | 0.75    | 14082.6  | -0.15              | -1.22, 0.91  | 0.78    | 14081.3  | -0.16                             | -1.23, 0.9   | 0.76    | 14083.0  |
| diabetes*time                           | 0.06                | -0.13, 0.25  | 0.53    |          | 0.06              | -0.13, 0.25  | 0.51    |          | 0.06               | -0.13, 0.25  | 0.54    |          | 0.06                              | -0.13, 0.25  | 0.53    |          |
| PE                                      |                     |              |         |          | -0.14             | -0.62, 0.33  | 0.56    |          | 0.32               | -0.16, 0.79  | 0.20    |          | 0.00                              | -0.59, 0.58  | 0.99    |          |
| time <sup>b</sup>                       | -0.10               | -0.14, -0.06 | <0.01   |          | -0.09             | -0.15, -0.02 | <0.01   |          | -0.18              | -0.30, -0.06 | <0.01   |          | -0.10                             | -0.20, 0.00  | 0.05    |          |
| <b>Buschke WHICAP</b>                   |                     |              |         |          |                   |              |         |          |                    |              |         |          |                                   |              |         |          |
| diabetes <sup>a</sup>                   | -3.85               | -6.16, -1.54 | <0.01   | 14886.10 | -3.85             | -6.16, -1.54 | <0.01   | 14888.05 | -3.85              | -6.16, -1.54 | <0.01   | 14888.08 | -3.85                             | -6.16, -1.54 | <0.01   | 14888.08 |
| diabetes*time                           | 0.16                | -0.11, 0.43  | 0.24    |          | 0.16              | -0.11, 0.43  | 0.24    |          | 0.16               | -0.11, 0.44  | 0.24    |          | 0.16                              | -0.11, 0.43  | 0.24    |          |
| PE                                      |                     |              |         |          | 0.08              | -0.72, 0.89  | 0.84    |          | 0.08               | -1.15, 1.31  | 0.90    |          | 0.06                              | -0.94, 1.05  | 0.91    |          |
| time <sup>b</sup>                       | -0.53               | -0.63, -0.43 | <0.01   |          | -0.54             | -0.67, -0.40 | <0.01   |          | -0.56              | -1.04, -0.08 | 0.02    |          | -0.54                             | -0.77, -0.31 | <0.01   |          |
| <b>Immediate Recall NAS<sup>c</sup></b> |                     |              |         |          |                   |              |         |          |                    |              |         |          |                                   |              |         |          |
| diabetes <sup>a</sup>                   | 0.09                | -0.71, 0.89  | 0.83    | 12728.5  | 0.12              | -0.68, 0.91  | 0.78    | 12724.1  | 0.10               | -0.70, 0.90  | 0.80    | 12719.7  | 0.13                              | -0.67, 0.92  | 0.76    | 12718.7  |
| diabetes*time                           | 0.01                | -0.13, 0.14  | 0.93    |          | 0.00              | -0.14, 0.13  | 0.95    |          | 0.00               | -0.13, 0.14  | 0.99    |          | -0.01                             | -0.14, 0.13  | 0.91    |          |
| PE                                      |                     |              |         |          | 0.44              | 0.10, 0.78   | 0.01    |          | 0.61               | 0.25, 0.98   | <0.01   |          | 0.76                              | 0.32, 1.19   | <0.01   |          |
| time <sup>b</sup>                       | -0.09               | -0.12, -0.06 | <0.01   |          | -0.14             | -0.19, -0.09 | <0.0001 |          | -0.24              | -0.34, -0.15 | <0.01   |          | -0.21                             | -0.29, -0.14 | <0.01   |          |

3C, Three-City Study; AIC, Akaike information criterion; Buschke, Buschke Selective Reminding test; CI, confidence interval, NAS, Normative Aging Study; WHICAP, Washington Heights-Inwood Community Aging Project.

a. Diabetes coefficients are for diabetic patients.

b. Time coefficients are for one year of aging.

c. Analyses in NAS included up to 4 repeat assessments per individual, given the extremely small number of persons with 5 repeat assessments.

**Web Table 4.** Effects of Different Practice Effects Specifications on Cognitive Change for Depression by Study, Balanced Data From 3C-Dijon (Dijon, France, 1999–2010), NAS (Greater Boston Area, MA, 1993–2007) and WHICAP (New York City, NY, 1999–2012) Using Time Elapsed (Years) Since Baseline as the Time Scale With Main Exposure by Time Interaction and Exposure by Practice Effects Interaction

|                                | No Practice Effects |              |                |          | Visit 1 Indicator |              |                |          |
|--------------------------------|---------------------|--------------|----------------|----------|-------------------|--------------|----------------|----------|
|                                | $\beta$             | 95% CI       | <i>P</i> Value | AIC      | $\beta$           | 95% CI       | <i>P</i> Value | AIC      |
| <b>Verbal Fluency 3C-Dijon</b> |                     |              |                |          |                   |              |                |          |
| depression <sup>a</sup>        | -0.57               | -1.01, -0.14 | 0.01           | 52229.0  | -0.64             | -1.12, -0.16 | 0.01           | 52139    |
| depression*time                | 0.00                | -0.05, 0.05  | 0.87           |          | -0.01             | -0.07, 0.06  | 0.831          |          |
| PEs                            |                     |              |                |          | 0.71              | 0.55, 0.86   | <0.01          |          |
| time <sup>b</sup>              | -0.14               | -0.15, -0.12 | <0.01          |          | -0.2              | -0.22, -0.17 | <0.01          |          |
| depression*PEs                 |                     |              |                |          | 0.14              | -0.31, 0.6   | 0.539          |          |
| <b>Verbal Fluency WHICAP</b>   |                     |              |                |          |                   |              |                |          |
| depression <sup>a</sup>        | -0.44               | -1.22, 0.34  | 0.27           | 12009.31 | -0.70             | -1.54, 0.15  | 0.11           | 12007.78 |
| depression*time                | -0.02               | -0.13, 0.08  | 0.70           |          | -0.10             | -0.24, 0.04  | 0.17           |          |
| PEs                            |                     |              |                |          | 0.15              | -0.36, 0.65  | 0.57           |          |
| time <sup>b</sup>              | -0.23               | -0.28, -0.17 | <0.01          |          | -0.24             | -0.32, -0.16 | <0.01          |          |
| depression*PEs                 |                     |              |                |          | 0.73              | -0.17, 1.63  | 0.11           |          |
| <b>Verbal Fluency NAS</b>      |                     |              |                |          |                   |              |                |          |
| depression <sup>a</sup>        | 0.20                | -1.36, 1.76  | 0.80           | 5607.0   | 0.42              | -1.21, 2.06  | 0.61           | 5609.9   |
| depression*time                | -0.02               | -0.24, 0.20  | 0.83           |          | 0.12              | -0.27, 0.52  | 0.54           |          |
| PEs                            |                     |              |                |          | 0.33              | -0.46, 1.12  | 0.41           |          |
| time <sup>b</sup>              | -0.13               | -0.2, -0.07  | <0.01          |          | -0.17             | -0.29, -0.06 | 0.004          |          |
| depression*PEs                 |                     |              |                |          | -1.14             | -3.66, 1.38  | 0.38           |          |
| <b>Buschke WHICAP</b>          |                     |              |                |          |                   |              |                |          |
| depression <sup>a</sup>        | -1.19               | -2.92, 0.53  | 0.18           | 14835.42 | -1.58             | -3.41, 0.25  | 0.09           | 14837.81 |
| depression*time                | 0.08                | -0.12, 0.29  | 0.42           |          | -0.04             | -0.31, 0.24  | 0.81           |          |
| PEs                            |                     |              |                |          | -0.22             | -1.19, 0.75  | 0.66           |          |
| time <sup>b</sup>              | -0.53               | -0.64, -0.41 | <0.01          |          | -0.50             | -0.66, -0.35 | <0.01          |          |
| depression*PEs                 |                     |              |                |          | 1.09              | -0.64, 2.83  | 0.22           |          |
| <b>Immediate Recall NAS</b>    |                     |              |                |          |                   |              |                |          |
| depression <sup>a</sup>        | 0.11                | -            | 0.84           | 5139.6   | 0.22              | -0.98, 1.41  | 0.72           | 5141.4   |
| depression*time                | -0.03               | 1.03, 1.26   | 0.69           |          | 0.03              | -0.25, 0.32  | 0.83           |          |
| PEs                            |                     | 0.18, 0.12   |                |          | 0.43              | -0.15, 1.00  | 0.15           |          |
| time <sup>b</sup>              | -0.06               | -            | 0.01           |          | -0.11             | -0.20, -0.03 | 0.01           |          |
| depression*PEs                 |                     | 0.11, -0.01  |                |          | -0.5              | -2.34, 1.33  | 0.59           |          |

3C, Three-City Study; AIC, Akaike information criterion; Buschke, Buschke selective reminding test; CI, confidence interval, NAS, normative aging study; PEs, practice effects; WHICAP, Washington Heights-Inwood Community Aging Project.

a. Depression coefficients are for depressive patients.

b. Time coefficients are for one year of aging.

**Web Table 5.** Effects of Different Practice Effects Specifications on Cognitive Change for Diabetes by Study, Balanced Data From 3C-Dijon (Dijon, France, 1999–2010), NAS (Greater Boston Area, MA, 1993–2007) and WHICAP (New York City, NY, 1999–2012) Using Time Elapsed (Years) Since Baseline as the Time Scale With Main Exposure by Time Interaction and Exposure by Practice Effects Interaction

|                                | No Practice Effects |              |         |          | Visit 1 Indicator |              |         |          |
|--------------------------------|---------------------|--------------|---------|----------|-------------------|--------------|---------|----------|
|                                | $\beta$             | 95% CI       | P Value | AIC      | $\beta$           | 95% CI       | P Value | AIC      |
| <b>Verbal Fluency 3C-Dijon</b> |                     |              |         |          |                   |              |         |          |
| diabetes <sup>a</sup>          | -0.51               | -1.05, 0.03  | 0.06    | 52231    | -0.5              | -1.03, 0.04  | 0.07    | 52135    |
| diabetes*time                  | -0.02               | -0.09, 0.04  | 0.48    |          | -0.63             | -1.12, -0.15 | 0.01    |          |
| PEs                            |                     |              |         |          | 0.71              | 0.56, 0.86   | <0.01   |          |
| time <sup>b</sup>              | -0.13               | -0.15, -0.12 | <0.01   |          | -0.19             | -0.22, -0.17 | <0.01   |          |
| diabetes*PE                    |                     |              |         |          | -0.02             | -0.09, 0.04  | 0.5     |          |
| <b>Verbal Fluency WHICAP</b>   |                     |              |         |          |                   |              |         |          |
| diabetes <sup>a</sup>          | -0.81               | -1.85, 0.25  | 0.13    | 12051.69 | -0.59             | -1.73, 0.55  | 0.31    | 12051.44 |
| diabetes*time                  | -0.03               | -0.17, 0.11  | 0.65    |          | 0.03              | -0.16, 0.22  | 0.74    |          |
| PEs                            |                     |              |         |          | 0.47              | 0.02, 0.92   | 0.04    |          |
| time <sup>b</sup>              | -0.23               | -0.28, -0.17 | 0       |          | -0.28             | -0.35, -0.21 | 0       |          |
| diabetes*PE                    |                     |              |         |          | -0.6              | -1.82, 0.62  | 0.33    |          |
| <b>Verbal Fluency NAS</b>      |                     |              |         |          |                   |              |         |          |
| diabetes <sup>a</sup>          | -1.65               | -3.58, 0.29  | 0.1     | 7876.1   | -2.02             | -4.05, 0.01  | 0.05    | 7878.7   |
| diabetes*time                  | 0.22                | -0.05, 0.5   | 0.11    |          | -0.02             | -0.52, 0.47  | 0.92    |          |
| PEs                            |                     |              |         |          | -0.09             | -0.73, 0.55  | 0.79    |          |
| time <sup>b</sup>              | -0.14               | -0.2, -0.09  | <0.01   |          | -0.13             | -0.23, -0.04 | 0.01    |          |
| diabetes*PE                    |                     |              |         |          | 1.87              | -1.24, 4.97  | 0.24    |          |
| <b>Buschke WHICAP</b>          |                     |              |         |          |                   |              |         |          |
| diabetes <sup>a</sup>          | -3.85               | -6.16, -1.54 | 0       | 14886.1  | -3.63             | -6.09, -1.18 | 0       | 14889.79 |
| diabetes*time                  | 0.16                | -0.11, 0.43  | 0.24    |          | 0.23              | -0.14, 0.60  | 0.23    |          |
| PEs                            |                     |              |         |          | 0.17              | -0.70, 1.03  | 0.7     |          |
| time <sup>b</sup>              | -0.53               | -0.63, -0.43 | 0       |          | -0.55             | -0.68, -0.41 | 0       |          |
| diabetes*PE                    |                     |              |         |          | -0.61             | -2.94, 1.73  | 0.61    |          |
| <b>Immediate Recall NAS</b>    |                     |              |         |          |                   |              |         |          |
| diabetes <sup>a</sup>          | 0.45                | -0.96, 1.87  | 0.53    | 7268     | 0.21              | -1.27, 1.69  | 0.78    | 7264.3   |
| diabetes*time                  | 0.01                | -0.18, 0.20  | 0.91    |          | -0.17             | -0.52, 0.18  | 0.34    |          |
| PEs                            |                     |              |         |          | 0.52              | 0.06, 0.97   | 0.03    |          |
| time <sup>b</sup>              | -0.08               | -0.12, -0.04 | <0.01   |          | -0.14             | -0.21, -0.08 | <.0001  |          |
| diabetes*PE                    |                     |              |         |          | 1.31              | -0.87, 3.49  | 0.24    |          |

AIC, Akaike information criterion; Buschke, Buschke selective reminding test; CI, confidence interval, NAS, normative aging study; PEs, practice effects; WHICAP, Washington Heights-Inwood Community Aging Project.

a. Diabetes coefficients are for diabetic patients.

b. Time coefficients are for one year of aging.
